# Supplementary material for: Efficacy and Safety of CGRP Monoclonal Antibodies for Migraine Prevention in Episodic Migraine; a Network Meta-analysis
Source: Research Square preprint supplement (doi:10.21203/rs.3.rs-7517901/v1), 2025-10-10
Supplement: Supplementary file 1 [file 59940685ec4dca33e3d23830.docx]

|  | **Population** | **Intervention** | **Comparator** | **Outcomes** | **Study Design** |
| --- | --- | --- | --- | --- | --- |
| Definition | Diagnosis of Episodic Migraine | Use of anti CGRP monoclonal antibodies | Placebo | - |  |
| MeSH Heading | Migraine Disorder | Ajovy (fremanezumab), Aimovig (erenumab), Emgality (galcanezumab), Vyepti (eptinezumab) | Placebo |  |  |
| Entry terms | - Disorder, Migraine - Disorders, Migraine - Migraine Disorder - Headache, Migraine - Headaches, Migraine - Migraine Headaches - Migraine - Migraines - Migraine Headache - Acute Confusional Migraine - Acute Confusional Migraines - Migraine, Acute Confusional - Migraines, Acute Confusional - Status Migrainosus - Abdominal Migraine - Abdominal Migraines - Migraine, Abdominal - Migraines, Abdominal - Cervical Migraine Syndrome - Cervical Migraine Syndromes - Migraine Syndrome, Cervical - Migraine Syndromes, Cervical - Hemicrania Migraine - Hemicrania Migraines - Migraine, Hemicrania - Migraines, Hemicrania - Migraine Variant - Migraine Variants - Variant, Migraine - Variants, Migraine - Sick Headache - Headache, Sick - Headaches, Sick - Sick Headaches | - AMG 334 - Aimovig - erenumab-aooe - fremanezumab-vfrm - Ajovy - galcanezumab-gnlm - Emgality - TEV-48125 - LY2951742 - LY-2951742 - ALD403 - ALD-403 - vyepti | Sham Treatment |  |  |

**Table 1: PICOS Table**

**Search Query:**

(Migraine Disorder OR Headache, Migraine OR Migraine Headaches OR Migraine OR Migraine Headache OR Acute Confusional Migraine OR Migraine, Acute Confusional OR Status Migrainosus OR Abdominal Migraine OR Migraine, Abdominal OR Cervical Migraine Syndrome OR Migraine Syndrome, Cervical OR Hemicrania Migraine OR Migraine, Hemicrania OR Migraine Variant OR Variant, Migraine OR Sick Headache OR Headaches, Sick) AND (Erenumab OR AMG 334 OR Aimovig OR erenumab-aooe OR fremanezumab-vfrm OR Ajovy OR galcanezumab-gnlm OR Emgality) OR (Fremanezumab OR TEV-48125) OR (galcanezumab OR LY2951742 OR LY-2951742) OR ( Eptinezumab OR ALD403 OR ALD-403 OR vyepti) AND (Placebo OR sham treatment) AND (RCT OR Randomized control trial)

| Study , Auther, Year | Drug | Population | Mean Age | Male | Mean(SD) numbEr of migraine days | Mean(SD)numbEr of headache days | Mean(SD)% days with headache medication usage |
| --- | --- | --- | --- | --- | --- | --- | --- |
| Ashina 2020 | Eptinezumab 30mg | 219 | 39.1(11.54) | 34 | 8.7(3.05) | 10.2(3.35) | 24.9(18.65) |
| Eptinezumab 100mg | 223 | 40.0(10.66) | 44 | 8.7(2.85) | 10.0(3.02) | 24.7(17.44) |
| Eptinezumab 300mg | 224 | 40.2(11.72) | 25 | 8.6(2.87) | 10.1(3.06) | 26.1(19.40) |
| Placebo | 222 | 39.9(11.67) | 36 | 8.4(2.68) | 9.9(2.83) | 24.7(19.14) |
| BiGal 2015 | Fremanezumab 225 mg | 96 | 40·8 (12·4) | 9 | 11·5 (1·9) | 12·6 (3·1) | 10·4 (3·6) |
| Fremanezumab 675 mg | 97 | 40·7 (12·6) | 15 | 11·3 (2·2) | 12·5 (2·65) | 9·8 (4·0) |
| Placebo | 104 | 42·0 (11·6) | 12 | 11·5 (2·24) | 12·4 (2·3) | 10·4 (3·6) |
| Chawdhury 2022 | Erenumab 70 mg | 133 | 34.9 (9.2) | 31 | 7.69 (2.67) | 8.75 (2.88) | 0.20 (1.14) |
| Erenumab 140 mg | 94 | 35.4 (7.2) | 16 | 8.34 (3.75) | 9.48 (4.67) | 0.10 (0.58) |
| Placebo | 124 | 35.3 (8.9) | 27 | 7.56 (2.27) | 8.50 (2.55) | 0.20 (1.00) |
| Dodick 2018 (a) | Erenumab 70 mg | 286 | 42 ± 11 | 41 | 8.1 ± 2.7 | 9.1 ± 2.7 | 3.7 ± 3.6 |
| Placebo | 291 | 42 ± 12 | 44 | 8.4 ± 2.6 | 9.3 ± 2.7 | 3.4 ± 3.6 |
| Dodick 2018 (b) | Fremanezumab 225 mg | 290 | 42.9(12.67) | 46 | 8.9(2.63) | 11.0(2.49) | 7.7(3.37) |
| Fremanezumab 675 mg | 291 | 41.1(11.41) | 40 | 9.3(2.65) | 11.1(2.42) | 7.8(3.74) |
| Placebo | 294 | 41.3(12.04) | 47 | 9.1(2.65) | 11.2(2.45) | 7.7(3.60) |
| Goadsby 2017 | Erenuman 70 mg | 317 | 41.1 ± 11.3 (18-63) | 49 | 8.3 ± 2.5 | 9.1 ± 2.6 | 3.2 ± 3.4 |
| Erenumab 140 mg | 319 | 40.4 ± 11.1 (19-65) | 47 | 8.3 ± 2.5 | 9.3 ± 2.5 | 3.4 ± 3.5 |
| Placebo | 319 | 41.3 ± 11.2(18-65) | 45 | 8.2 ± 2.5 | 9.3 ± 2.6 | 3.4 ± 3.4 |
| Hu 2022 | Galcanezumab 120mg | 261 | 37.2 (9.3) | 73 | 8.2 (2.8) | 9.1 (3.3) | 5.4 (4.9) |
| Placebo | 259 | 36.8 (9.8) | 63 | 8.3 (2.7) | 9.1 ( 2.9) | 4.9 (4.5) |
| ReutEr 2018 | Erenumab 140 mg | 118 | 44.6 (10.5) | 24 | 9.2 (2.6) | 10.1 (2.8) | 9.2 (2.6) |
| Placebo | 122 | 44.2 (10.6) | 22 | 9.3 (2.7) | 10.1 (2.7) | 9.3 (2.7) |
| Sakai 2019 | Erenumab 28mg | 67 | 43 | 12 | 7.7 (2.1) | 8.9 (2.2) | 5.5 (2.8) |
| Erenumab 70mg | 135 | 44 | 20 | 7.8 (2.3) | 9.0 (2.6) | 5.4 (2.9) |
| Erenumab 140mg | 137 | 45 | 25 | 8.1 (2.4) | 9.6 (2.6) | 5.9 (2.9) |
| Placebo | 136 | 43 | 18 | 7.7 (2.3) | 9.1 (2.6) | 5.6 (2.5) |
| Sakai 2020 | Galcanezumab 120 mg | 115 | 43.2(10.0) | 20 | N/A | 8.6(2.8) | 7.3(2.9) |
| Galcanezumab 240 mg | 114 | 44.8(10.2) | 18 | N/A | 9.0(3.0) | 7.8(3.0) |
| Placebo | 230 | 44.2(10.0) | 34 | N/A | 8.6(3.0) | 7.4(3.0) |
| Sakai 2021 | Fremanezumab 225mg | 121 | 44.4 (9.5) | 20 | 8.6 (2.5) | 11.0 (2.1) | 120 (99.2) |
| Fremanezumab 675mg | 119 | 41.9 (10.1) | 18 | 8.7 (2.5) | 11.0 (2.5) | 117 (98.3) |
| Placebo | 117 | 44.2 (10.7) | 17 | 9.0 (2.8) | 11.1 (2.5) | 117 (100.0) |
| Shljarevski 2018 (a) | Galcanezumab 5mg | 68 | 41.40(11.15) | 13 | 6.68(2.73) | N/A | N/A |
| Galcanezumab 50mg | 68 | 39.63(12.42) | 7 | 6.41(2.66) | N/A | N/A |
| Galcanezumab 120mg | 70 | 40.57(10.92) | 11 | 6.95(2.56) | N/A | N/A |
| Galcanezumab 300mg | 67 | 40.79(13.20) | 11 | 6.73(2.48) | N/A | N/A |
| Placebo | 137 | 39.54(12.10) | 28 | 6.64(2.73) | N/A | N/A |
| Shljarevski 2018 (b) | Galcanezumab 120 mg | 231 | 40.9 (11.2) | 33 | N/A | 9.07 (2.9) | 7.47 (3.3) |
| Galcanezumab 240 mg | 223 | 41.9 (10.8) | 33 | N/A | 9.06 (2.9) | 7.47 (3.3) |
| Placebo | 461 | 42.3 (11.3) | 68 | N/A | 9.2 (3.0) | 7.6 (3.4) |
| StauffEr 2024 | Galcanezumab 120 mg | 213 | 40.9 (11.9) | 32 | 9.2 (3.1) | 9.21(3.05) | N/A |
| Galcanezumab 240 mg | 212 | 39.1 (11.5 | 37 | 9.1 (2.9) | 9.14(2.91) | N/A |
| Placebo | 433 | 41.3 (11.4) | 71 | 9.1 (3.0) | 9.08(2.97) | N/A |
| Sun 2016 | Erenumab 7 mg | 108 | 40·3 (10·9) | 20 | 8·6 (2·8) | N/A | N/A |
| Erenumab 21 mg | 108 | 39·9 (12·3) | 21 | 8·9 (2·9) | N/A | N/A |
| Erenumab 70 mg | 107 | 42·6 (9·9) | 25 | 8·6 (2·5) | N/A | N/A |
| Placebo | 160 | 41·4 (10·0) | 28 | 8·8 (2·7) | N/A | N/A |
| Wang 2021 | Erenumab 70mg | 338 | 37.3 (10.0) | 66 | 8.1 (2.6) | 9.2 (2.7) | 308 (91.1) |
| Erenumab 140mg | 224 | 37.1 (9.6) | 40 | 8.3 (3.1) | 9.5 (3.9) | 207 (92.4) |
| Placebo | 338 | 38.0 (10.1) | 57 | 8.4 (2.8) | 9.2 (2.8) | 313 (92.6) |

**Table 2: Baseline**

| eptinezumab 100mg | -0.13 [-0.48; 0.22] | -0.03 [-0.38; 0.32] | . | . | . | . | . | . | . | . | . | . | . | . | 0.23 [-0.12; 0.58] |
| --- | --- | --- | --- | --- | --- | --- | --- | --- | --- | --- | --- | --- | --- | --- | --- |
| -0.13 [-0.48; 0.22] | eptinezumab 300mg | 0.10 [-0.25; 0.45] | . | . | . | . | . | . | . | . | . | . | . | . | 0.36 [ 0.01; 0.71] |
| -0.03 [-0.38; 0.32] | 0.10 [-0.25; 0.45] | eptinezumab 30mg | . | . | . | . | . | . | . | . | . | . | . | . | 0.26 [-0.09; 0.62] |
| -0.15 [-0.54; 0.23] | -0.02 [-0.41; 0.37] | -0.12 [-0.50; 0.27] | erenumab 140mg | . | 0.21 [-0.21; 0.63] | 0.08 [-0.10; 0.27] | . | . | . | . | . | . | . | . | 0.38 [ 0.22; 0.55] |
| 0.19 [-0.31; 0.69] | 0.32 [-0.18; 0.82] | 0.22 [-0.27; 0.72] | 0.34 [-0.03; 0.72] | erenumab 21mg | . | -0.20 [-0.61; 0.20] | 0.17 [-0.24; 0.57] | . | . | . | . | . | . | . | -0.01 [-0.40; 0.38] |
| 0.06 [-0.44; 0.57] | 0.20 [-0.31; 0.70] | 0.10 [-0.41; 0.61] | 0.22 [-0.15; 0.59] | -0.13 [-0.63; 0.37] | erenumab 28mg | -0.34 [-0.76; 0.08] | . | . | . | . | . | . | . | . | 0.37 [-0.05; 0.79] |
| -0.07 [-0.45; 0.31] | 0.06 [-0.32; 0.44] | -0.04 [-0.42; 0.34] | 0.08 [-0.09; 0.25] | -0.26 [-0.62; 0.10] | -0.13 [-0.50; 0.23] | erenumab 70mg | 0.37 [-0.03; 0.77] | . | . | . | . | . | . | . | 0.30 [ 0.15; 0.45] |
| 0.36 [-0.14; 0.86] | 0.49 [ 0.00; 0.99] | 0.39 [-0.10; 0.89] | 0.51 [ 0.14; 0.89] | 0.17 [-0.24; 0.57] | 0.30 [-0.20; 0.79] | 0.43 [ 0.08; 0.78] | erenumab 7mg | . | . | . | . | . | . | . | -0.18 [-0.57; 0.21] |
| -0.27 [-0.69; 0.14] | -0.14 [-0.56; 0.27] | -0.24 [-0.66; 0.17] | -0.12 [-0.39; 0.15] | -0.47 [-0.88; -0.05] | -0.34 [-0.77; 0.09] | -0.21 [-0.47; 0.06] | -0.63 [-1.05; -0.22] | fremanezumab 225mg | 0.04 [-0.18; 0.26] | . | . | . | . | . | 0.51 [ 0.29; 0.72] |
| -0.24 [-0.65; 0.18] | -0.10 [-0.52; 0.31] | -0.20 [-0.62; 0.21] | -0.08 [-0.36; 0.19] | -0.43 [-0.84; -0.01] | -0.30 [-0.73; 0.13] | -0.17 [-0.43; 0.09] | -0.60 [-1.01; -0.18] | 0.04 [-0.18; 0.26] | fremanezumab 675mg | . | . | . | . | . | 0.47 [ 0.25; 0.69] |
| -0.27 [-0.66; 0.12] | -0.14 [-0.53; 0.25] | -0.24 [-0.62; 0.15] | -0.12 [-0.35; 0.11] | -0.46 [-0.85; -0.07] | -0.34 [-0.74; 0.06] | -0.20 [-0.42; 0.01] | -0.63 [-1.02; -0.25] | 0.00 [-0.27; 0.28] | -0.03 [-0.31; 0.24] | galcanezumab 120mg | 0.03 [-0.18; 0.24] | 0.19 [-0.26; 0.64] | 0.24 [-0.20; 0.69] | 0.21 [-0.24; 0.65] | 0.50 [ 0.34; 0.66] |
| -0.27 [-0.67; 0.13] | -0.14 [-0.54; 0.26] | -0.24 [-0.64; 0.16] | -0.12 [-0.37; 0.13] | -0.46 [-0.87; -0.06] | -0.34 [-0.75; 0.08] | -0.20 [-0.45; 0.04] | -0.63 [-1.03; -0.23] | 0.00 [-0.29; 0.29] | -0.04 [-0.33; 0.26] | -0.00 [-0.20; 0.20] | galcanezumab 240mg | . | . | . | 0.53 [ 0.33; 0.73] |
| 0.07 [-0.46; 0.59] | 0.20 [-0.32; 0.72] | 0.10 [-0.42; 0.62] | 0.22 [-0.20; 0.63] | -0.13 [-0.65; 0.40] | 0.00 [-0.53; 0.53] | 0.13 [-0.28; 0.55] | -0.29 [-0.81; 0.23] | 0.34 [-0.10; 0.78] | 0.30 [-0.14; 0.74] | 0.34 [-0.05; 0.73] | 0.34 [-0.08; 0.76] | galcanezumab 300mg | 0.05 [-0.40; 0.50] | 0.01 [-0.44; 0.46] | 0.06 [-0.36; 0.48] |
| 0.12 [-0.40; 0.64] | 0.25 [-0.27; 0.77] | 0.15 [-0.37; 0.67] | 0.27 [-0.15; 0.69] | -0.07 [-0.60; 0.45] | 0.05 [-0.48; 0.58] | 0.19 [-0.22; 0.60] | -0.24 [-0.76; 0.28] | 0.39 [-0.05; 0.83] | 0.35 [-0.09; 0.79] | 0.39 [ 0.00; 0.78] | 0.39 [-0.03; 0.81] | 0.05 [-0.40; 0.50] | galcanezumab 50mg | -0.04 [-0.49; 0.41] | 0.01 [-0.41; 0.42] |
| 0.08 [-0.44; 0.60] | 0.21 [-0.31; 0.73] | 0.11 [-0.41; 0.63] | 0.23 [-0.19; 0.65] | -0.11 [-0.63; 0.41] | 0.01 [-0.52; 0.54] | 0.15 [-0.26; 0.56] | -0.28 [-0.80; 0.24] | 0.35 [-0.09; 0.80] | 0.31 [-0.13; 0.76] | 0.35 [-0.04; 0.74] | 0.35 [-0.07; 0.77] | 0.01 [-0.44; 0.46] | -0.04 [-0.49; 0.41] | galcanezumab 5mg | 0.05 [-0.37; 0.46] |
| 0.23 [-0.12; 0.58] | 0.36 [ 0.01; 0.71] | 0.26 [-0.09; 0.62] | 0.38 [ 0.22; 0.54] | 0.04 [-0.31; 0.39] | 0.17 [-0.20; 0.53] | 0.30 [ 0.15; 0.44] | -0.13 [-0.48; 0.22] | 0.51 [ 0.29; 0.72] | 0.47 [ 0.25; 0.68] | 0.50 [ 0.34; 0.66] | 0.50 [ 0.31; 0.70] | 0.16 [-0.22; 0.55] | 0.11 [-0.27; 0.50] | 0.15 [-0.23; 0.54] | placebo |

**Table 3: League Table MMD**


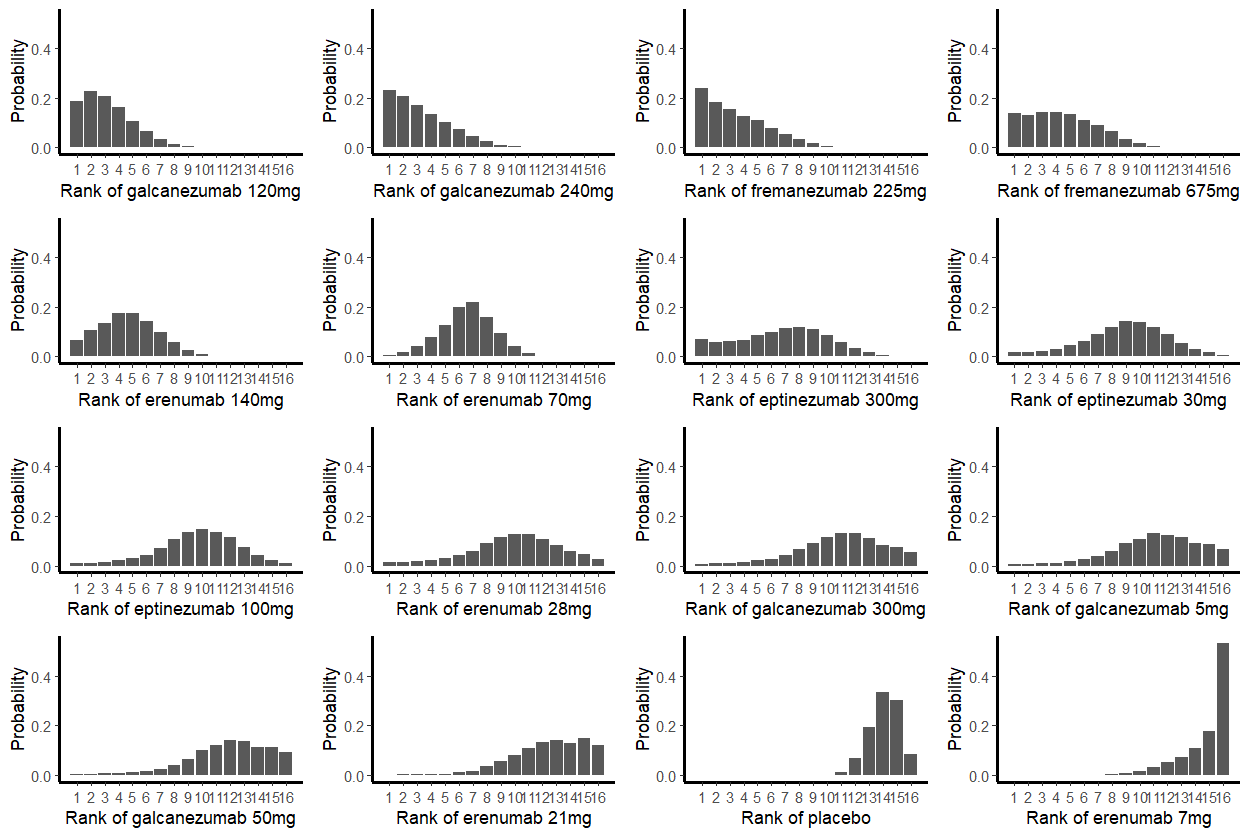


**Figure 1: Rank plot for Change in MMD from baseline**


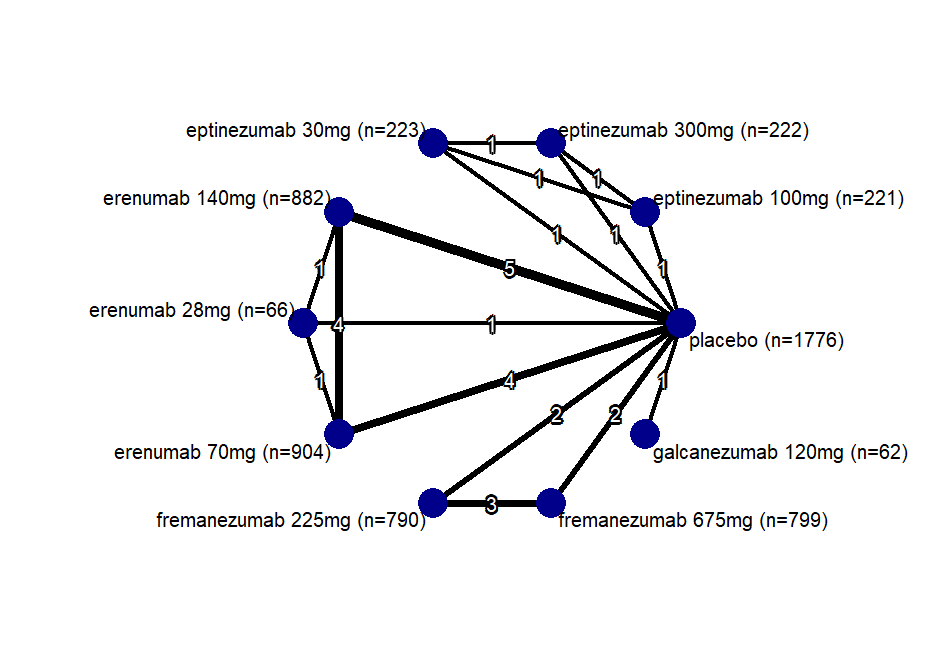


**Figure 2: Network plot of 50%**

| eptinezumab 100mg | 0.77 [0.38; 1.56] | 0.98 [0.49; 1.99] | . | . | . | . | . | . | 1.66 [0.82; 3.37] |
| --- | --- | --- | --- | --- | --- | --- | --- | --- | --- |
| 0.77 [0.38; 1.56] | eptinezumab 300mg | 1.28 [0.63; 2.58] | . | . | . | . | . | . | 2.16 [1.06; 4.38] |
| 0.98 [0.49; 1.99] | 1.28 [0.63; 2.58] | eptinezumab 30mg | . | . | . | . | . | . | 1.69 [0.83; 3.43] |
| 0.73 [0.33; 1.61] | 0.95 [0.43; 2.09] | 0.74 [0.34; 1.64] | erenumab 140mg | 1.51 [0.59; 3.83] | 1.00 [0.70; 1.45] | . | . | . | 2.32 [1.63; 3.29] |
| 0.99 [0.33; 3.01] | 1.29 [0.42; 3.92] | 1.01 [0.33; 3.07] | 1.36 [0.59; 3.15] | erenumab 28mg | 0.60 [0.24; 1.53] | . | . | . | 3.09 [1.06; 8.99] |
| 0.75 [0.34; 1.67] | 0.98 [0.44; 2.17] | 0.76 [0.34; 1.70] | 1.03 [0.72; 1.47] | 0.76 [0.33; 1.76] | erenumab 70mg | . | . | . | 2.19 [1.50; 3.19] |
| 0.52 [0.22; 1.26] | 0.68 [0.28; 1.65] | 0.53 [0.22; 1.29] | 0.72 [0.38; 1.35] | 0.53 [0.19; 1.44] | 0.70 [0.37; 1.32] | fremanezumab 225mg | 1.02 [0.68; 1.53] | . | 3.23 [1.87; 5.60] |
| 0.53 [0.22; 1.29] | 0.70 [0.29; 1.68] | 0.54 [0.23; 1.31] | 0.73 [0.39; 1.38] | 0.54 [0.20; 1.47] | 0.71 [0.38; 1.35] | 1.02 [0.68; 1.53] | fremanezumab 675mg | . | 3.14 [1.81; 5.44] |
| 0.86 [0.27; 2.72] | 1.12 [0.35; 3.54] | 0.88 [0.28; 2.77] | 1.18 [0.44; 3.12] | 0.87 [0.25; 3.02] | 1.15 [0.43; 3.05] | 1.64 [0.58; 4.69] | 1.61 [0.56; 4.59] | galcanezumab 120mg | 1.93 [0.78; 4.78] |
| 1.66 [0.82; 3.37] | 2.16 [1.06; 4.38] | 1.69 [0.83; 3.43] | 2.27 [1.60; 3.22] | 1.67 [0.71; 3.93] | 2.21 [1.53; 3.19] | 3.17 [1.87; 5.36] | 3.10 [1.84; 5.25] | 1.93 [0.78; 4.78] | placebo |

**Table 4: League table 50%**


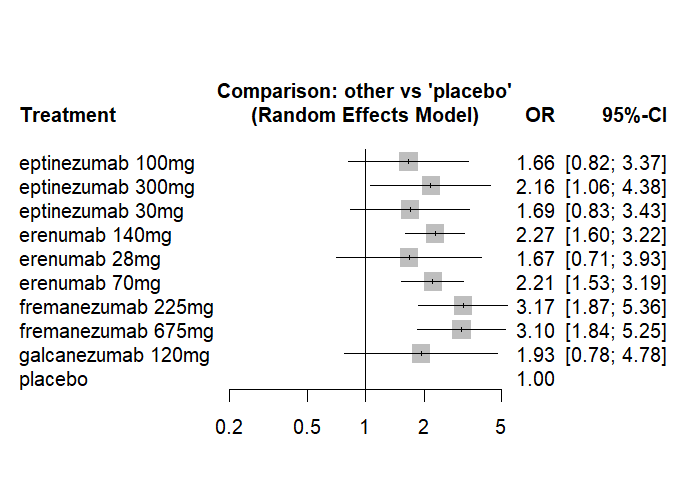


**Figure 3: Forest plot of 50%**


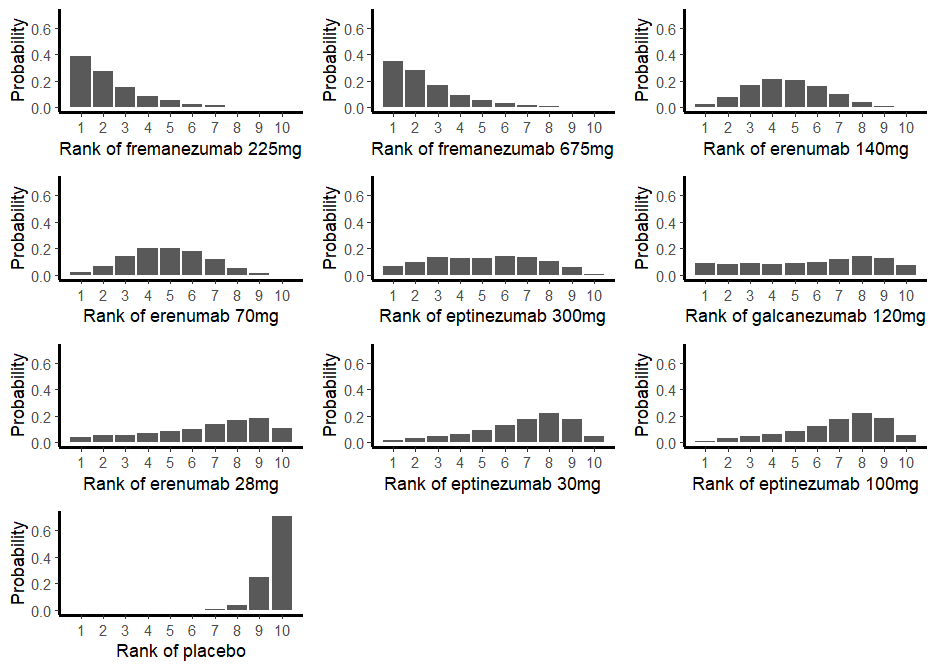


**Figure 4: Rank plot of 50%**


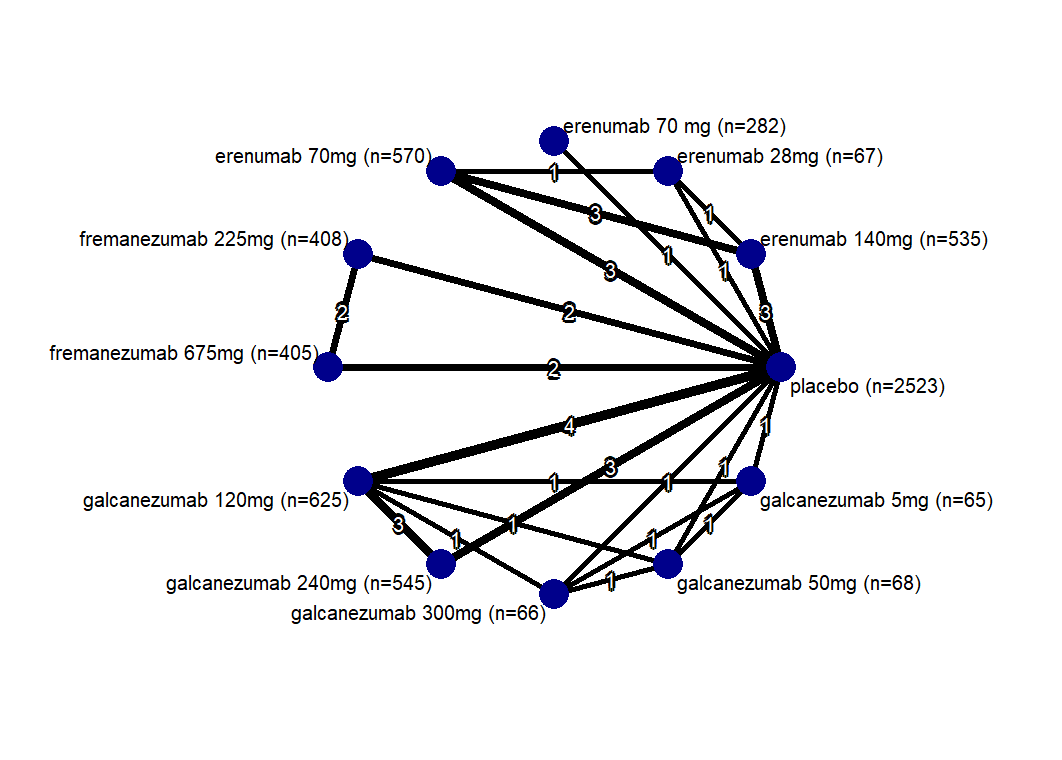


**Figure 5: Network plot of Acute Med**

| erenumab 140mg | 0.37 [-0.15; 0.89] | . | 0.16 [-0.13; 0.44] | . | . | . | . | . | . | . | 0.52 [ 0.24; 0.81] |
| --- | --- | --- | --- | --- | --- | --- | --- | --- | --- | --- | --- |
| 0.57 [ 0.10; 1.04] | erenumab 28mg | . | -0.38 [-0.91; 0.14] | . | . | . | . | . | . | . | -0.26 [-0.79; 0.26] |
| 0.17 [-0.38; 0.71] | -0.40 [-1.06; 0.26] | erenumab 70 mg | . | . | . | . | . | . | . | . | 0.36 [-0.11; 0.82] |
| 0.16 [-0.13; 0.44] | -0.41 [-0.88; 0.06] | -0.01 [-0.56; 0.53] | erenumab 70mg | . | . | . | . | . | . | . | 0.37 [ 0.09; 0.65] |
| -0.00 [-0.45; 0.44] | -0.57 [-1.15; 0.01] | -0.17 [-0.75; 0.41] | -0.16 [-0.60; 0.28] | fremanezumab 225mg | 0.01 [-0.33; 0.36] | . | . | . | . | . | 0.53 [ 0.18; 0.87] |
| 0.01 [-0.43; 0.46] | -0.55 [-1.13; 0.03] | -0.16 [-0.74; 0.42] | -0.14 [-0.59; 0.30] | 0.01 [-0.33; 0.36] | fremanezumab 675mg | . | . | . | . | . | 0.51 [ 0.17; 0.86] |
| -0.10 [-0.47; 0.27] | -0.67 [-1.19; -0.14] | -0.27 [-0.79; 0.26] | -0.26 [-0.63; 0.12] | -0.10 [-0.52; 0.32] | -0.11 [-0.53; 0.31] | galcanezumab 120mg | 0.05 [-0.23; 0.33] | 0.17 [-0.38; 0.72] | 0.39 [-0.16; 0.94] | 0.12 [-0.43; 0.67] | 0.62 [ 0.38; 0.87] |
| -0.08 [-0.47; 0.31] | -0.64 [-1.18; -0.10] | -0.25 [-0.78; 0.29] | -0.23 [-0.62; 0.15] | -0.08 [-0.51; 0.36] | -0.09 [-0.53; 0.34] | 0.02 [-0.25; 0.29] | galcanezumab 240mg | . | . | . | 0.63 [ 0.36; 0.90] |
| 0.18 [-0.37; 0.74] | -0.38 [-1.05; 0.29] | 0.01 [-0.66; 0.69] | 0.03 [-0.53; 0.59] | 0.19 [-0.40; 0.78] | 0.17 [-0.42; 0.76] | 0.28 [-0.20; 0.77] | 0.26 [-0.26; 0.79] | galcanezumab 300mg | 0.22 [-0.33; 0.77] | -0.05 [-0.60; 0.51] | 0.25 [-0.28; 0.77] |
| 0.40 [-0.15; 0.96] | -0.16 [-0.83; 0.51] | 0.23 [-0.44; 0.90] | 0.25 [-0.31; 0.80] | 0.41 [-0.18; 1.00] | 0.39 [-0.20; 0.98] | 0.50 [ 0.02; 0.99] | 0.48 [-0.04; 1.01] | 0.22 [-0.33; 0.77] | galcanezumab 50mg | -0.26 [-0.82; 0.29] | 0.03 [-0.50; 0.55] |
| 0.14 [-0.42; 0.70] | -0.43 [-1.10; 0.25] | -0.03 [-0.70; 0.64] | -0.02 [-0.58; 0.54] | 0.14 [-0.45; 0.73] | 0.13 [-0.47; 0.72] | 0.24 [-0.25; 0.73] | 0.22 [-0.31; 0.75] | -0.05 [-0.60; 0.51] | -0.27 [-0.82; 0.29] | galcanezumab 5mg | 0.29 [-0.24; 0.82] |
| 0.52 [ 0.24; 0.81] | -0.04 [-0.51; 0.43] | 0.36 [-0.11; 0.82] | 0.37 [ 0.09; 0.65] | 0.53 [ 0.18; 0.87] | 0.51 [ 0.17; 0.86] | 0.62 [ 0.38; 0.87] | 0.60 [ 0.34; 0.87] | 0.34 [-0.14; 0.82] | 0.12 [-0.36; 0.60] | 0.39 [-0.10; 0.87] | placebo |

**Table 5: League Table for Acute Med**


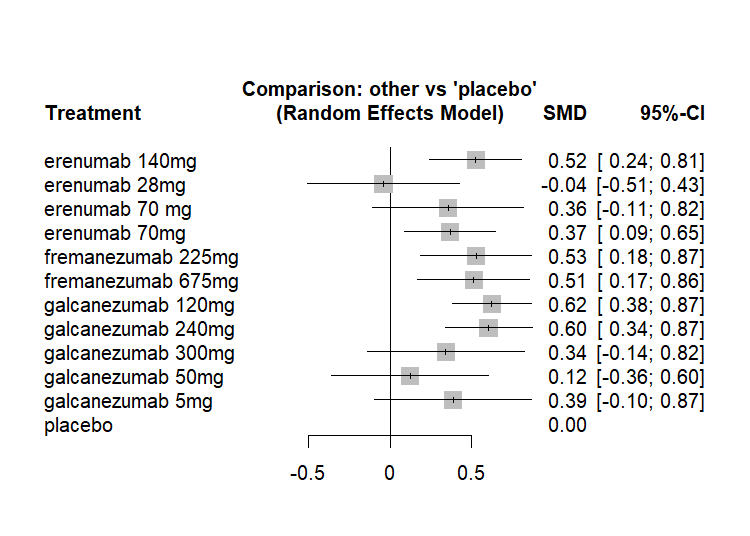


**Figure 6: Forest plot of Acute Med**


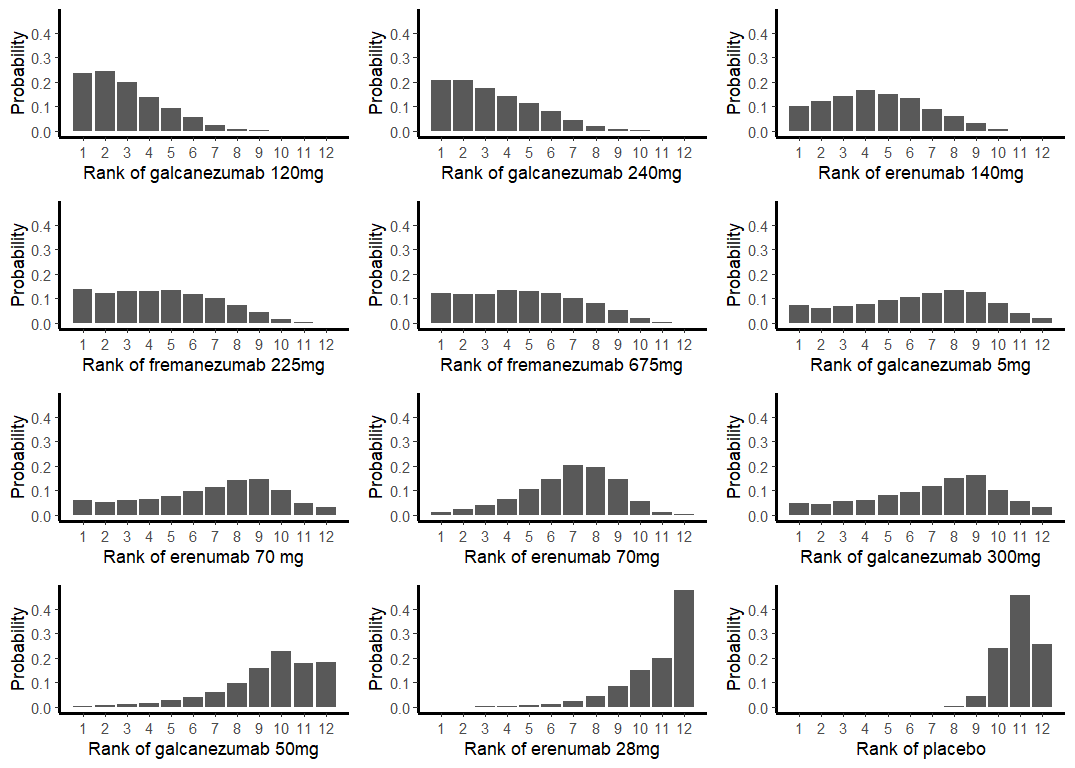


**Figure 7: Forest plot of Acute Med**


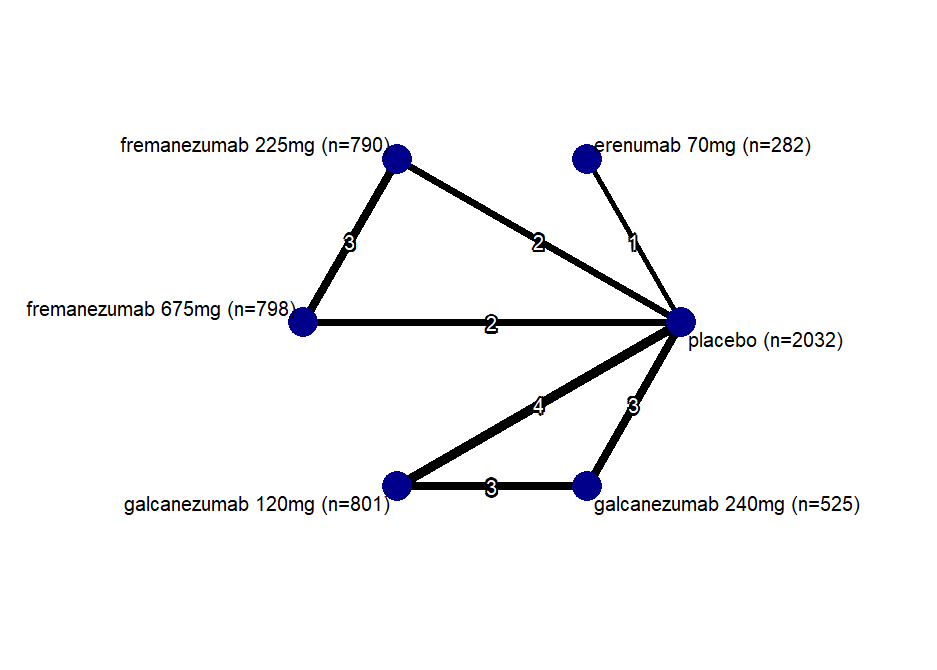


**Figure 8: Network plot of MIDAS score**

| erenumab 70mg | . | . | . | . | 0.10 [-0.14; 0.34] |
| --- | --- | --- | --- | --- | --- |
| -0.52 [-0.82; -0.23] | fremanezumab 225mg | 0.07 [-0.08; 0.21] | . | . | 0.65 [ 0.46; 0.83] |
| -0.45 [-0.75; -0.16] | 0.07 [-0.08; 0.21] | fremanezumab 675mg | . | . | 0.53 [ 0.34; 0.72] |
| -0.20 [-0.47; 0.07] | 0.32 [ 0.10; 0.54] | 0.25 [ 0.04; 0.47] | galcanezumab 120mg | 0.07 [-0.09; 0.22] | 0.30 [ 0.18; 0.42] |
| -0.14 [-0.42; 0.13] | 0.38 [ 0.15; 0.61] | 0.31 [ 0.08; 0.54] | 0.06 [-0.09; 0.21] | galcanezumab 240mg | 0.25 [ 0.10; 0.39] |
| 0.10 [-0.14; 0.34] | 0.62 [ 0.44; 0.80] | 0.55 [ 0.38; 0.73] | 0.30 [ 0.18; 0.42] | 0.24 [ 0.10; 0.38] | placebo |

**Table 6: League Table for MIDAS**


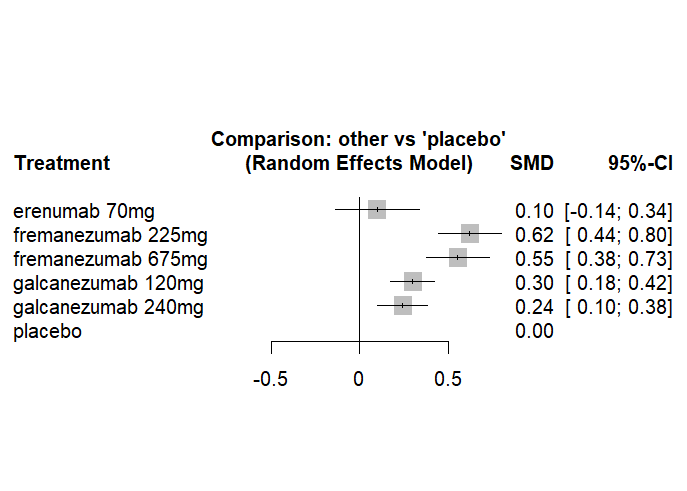


**Figure 9: Forest plot of MIDAS**


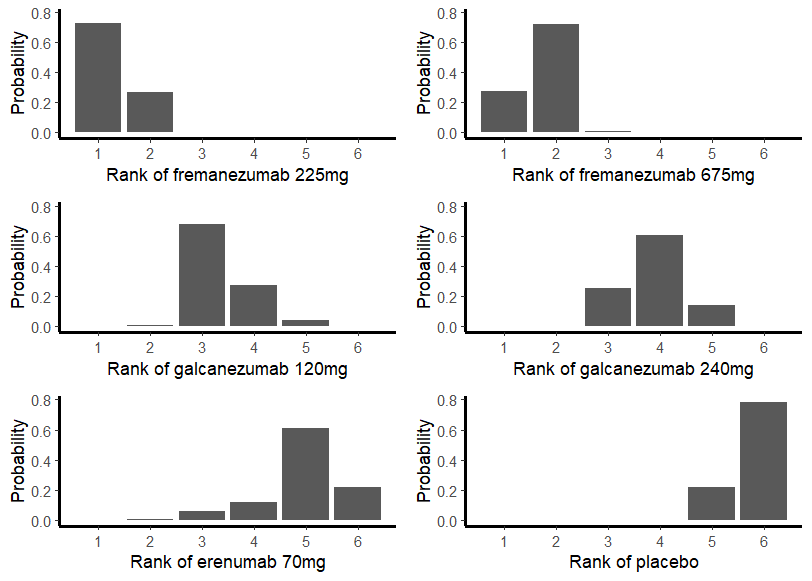


**Figure 10: Rank plot of MIDAS**


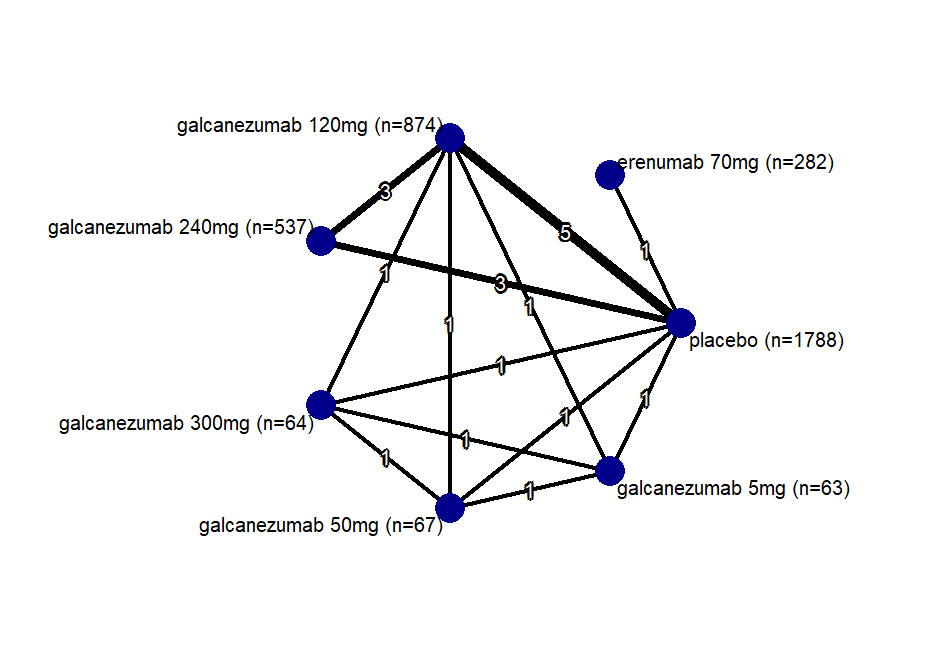


**Figure 11: Network plot for MSQ**

| erenumab 70mg | . | . | . | . | . | -0.24 [-0.40; -0.07] |
| --- | --- | --- | --- | --- | --- | --- |
| -0.69 [-0.88; -0.50] | galcanezumab 120mg | 0.06 [-0.06; 0.18] | 0.13 [-0.21; 0.48] | 0.24 [-0.11; 0.58] | 0.13 [-0.22; 0.48] | 0.45 [ 0.37; 0.54] |
| -0.63 [-0.82; -0.44] | 0.06 [-0.05; 0.17] | galcanezumab 240mg | . | . | . | 0.39 [ 0.29; 0.49] |
| -0.55 [-0.88; -0.22] | 0.14 [-0.15; 0.43] | 0.08 [-0.22; 0.38] | galcanezumab 300mg | 0.10 [-0.24; 0.45] | -0.00 [-0.35; 0.35] | 0.31 [ 0.01; 0.61] |
| -0.45 [-0.77; -0.12] | 0.24 [-0.04; 0.53] | 0.18 [-0.11; 0.48] | 0.10 [-0.24; 0.45] | galcanezumab 50mg | -0.11 [-0.45; 0.24] | 0.21 [-0.09; 0.50] |
| -0.55 [-0.88; -0.22] | 0.14 [-0.15; 0.43] | 0.07 [-0.23; 0.38] | -0.00 [-0.35; 0.35] | -0.11 [-0.45; 0.24] | galcanezumab 5mg | 0.32 [ 0.01; 0.62] |
| -0.24 [-0.40; -0.07] | 0.45 [ 0.37; 0.54] | 0.39 [ 0.29; 0.49] | 0.32 [ 0.03; 0.60] | 0.21 [-0.07; 0.49] | 0.32 [ 0.03; 0.60] | placebo |

**Table 7: League Table for MSQ**


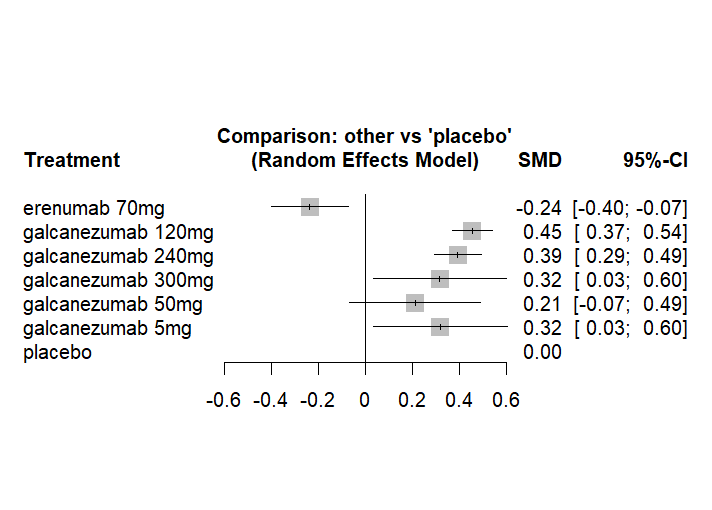


**Figure 12: Forest plot for MSQ**


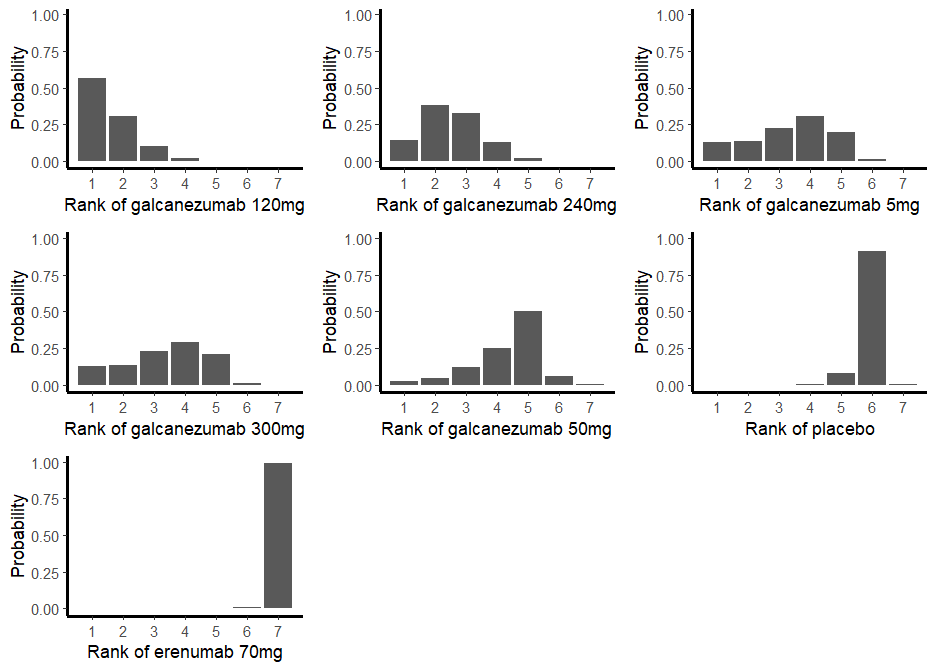


**Figure 13: Rank plot for MSQ**


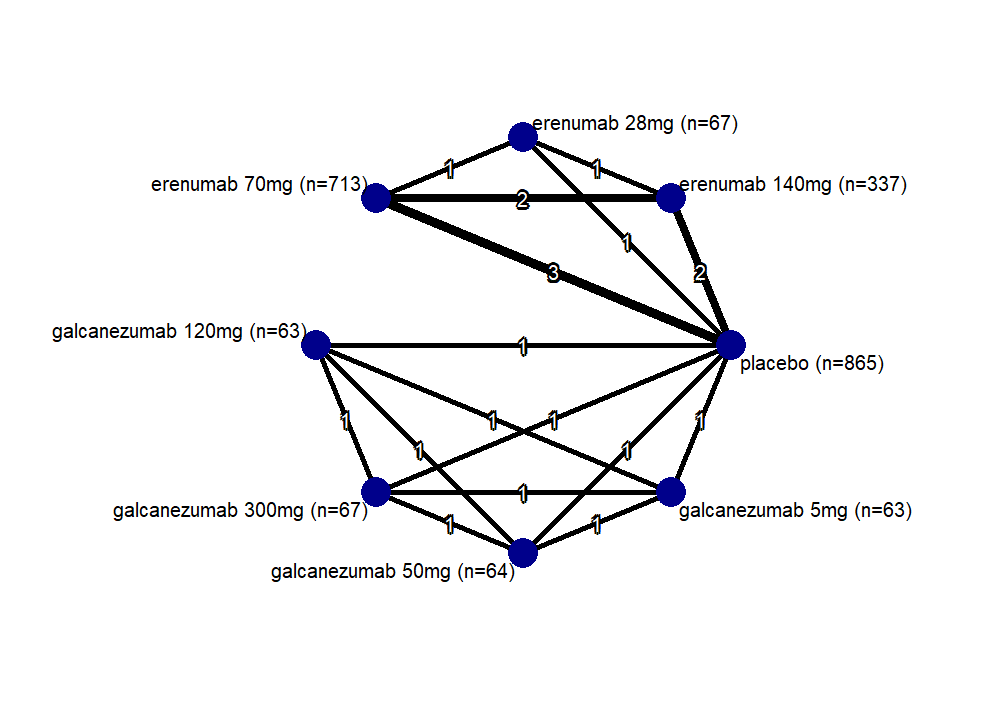


**Figure 14: Network for HIT 6**

| erenumab 140mg | 0.32 [ 0.02; 0.61] | 0.07 [-0.07; 0.21] | . | . | . | . | 0.36 [ 0.22; 0.50] |
| --- | --- | --- | --- | --- | --- | --- | --- |
| 0.34 [ 0.07; 0.61] | erenumab 28mg | -0.34 [-0.63; -0.04] | . | . | . | . | 0.06 [-0.24; 0.35] |
| 0.06 [-0.07; 0.20] | -0.28 [-0.55; -0.01] | erenumab 70mg | . | . | . | . | 0.30 [ 0.20; 0.41] |
| 0.18 [-0.15; 0.50] | -0.17 [-0.57; 0.24] | 0.11 [-0.20; 0.43] | galcanezumab 120mg | 0.11 [-0.24; 0.45] | 0.12 [-0.23; 0.47] | 0.05 [-0.30; 0.40] | 0.19 [-0.11; 0.49] |
| 0.28 [-0.04; 0.61] | -0.06 [-0.46; 0.34] | 0.22 [-0.09; 0.53] | 0.11 [-0.24; 0.45] | galcanezumab 300mg | 0.01 [-0.33; 0.36] | -0.06 [-0.40; 0.29] | 0.09 [-0.21; 0.38] |
| 0.29 [-0.03; 0.62] | -0.05 [-0.45; 0.35] | 0.23 [-0.08; 0.55] | 0.12 [-0.23; 0.47] | 0.01 [-0.33; 0.36] | galcanezumab 50mg | -0.07 [-0.42; 0.28] | 0.07 [-0.23; 0.37] |
| 0.22 [-0.11; 0.55] | -0.12 [-0.52; 0.28] | 0.16 [-0.16; 0.48] | 0.05 [-0.30; 0.40] | -0.06 [-0.40; 0.29] | -0.07 [-0.42; 0.28] | galcanezumab 5mg | 0.14 [-0.16; 0.44] |
| 0.37 [ 0.23; 0.50] | 0.03 [-0.24; 0.29] | 0.30 [ 0.20; 0.41] | 0.19 [-0.11; 0.49] | 0.09 [-0.21; 0.38] | 0.07 [-0.23; 0.37] | 0.14 [-0.16; 0.44] | placebo |

**Table 8: League Table for HIT-6**


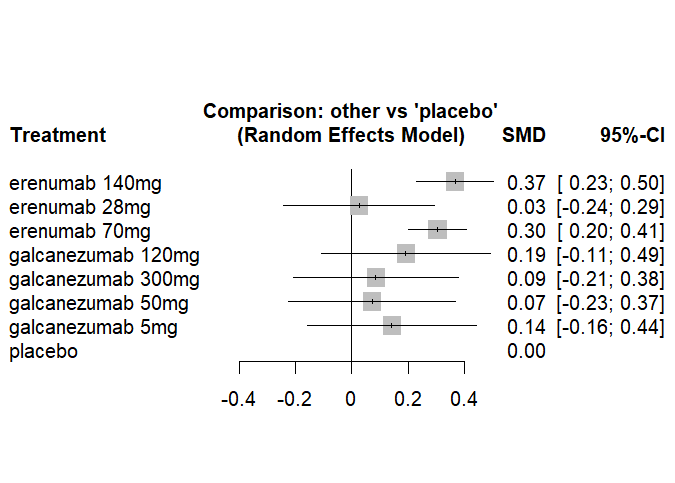


**Figure 15: Forest plot for HIT-6 Scores**


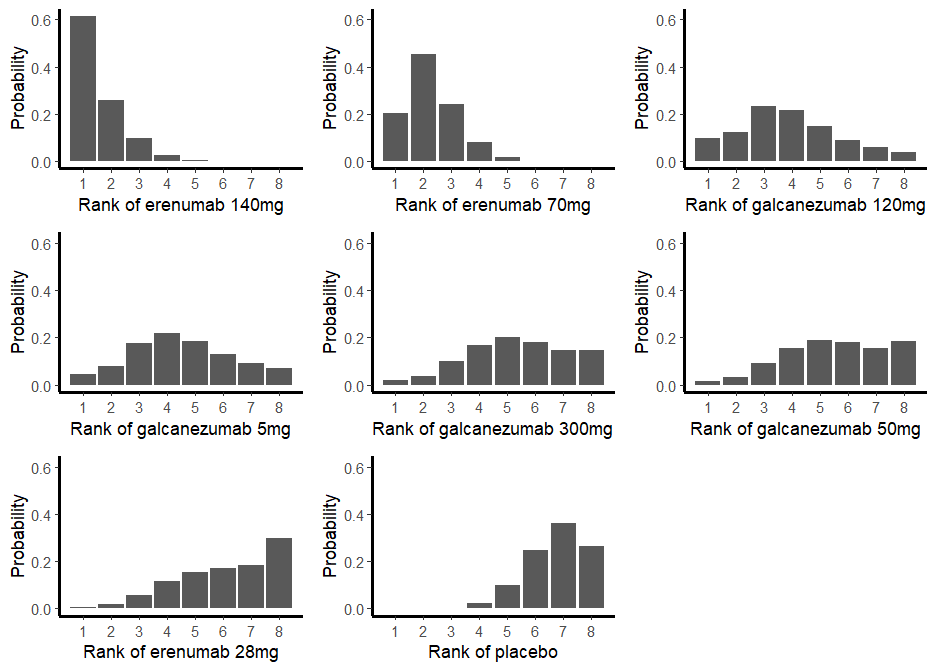


**Figure 16: Rank plot for HIT-6 Scores**


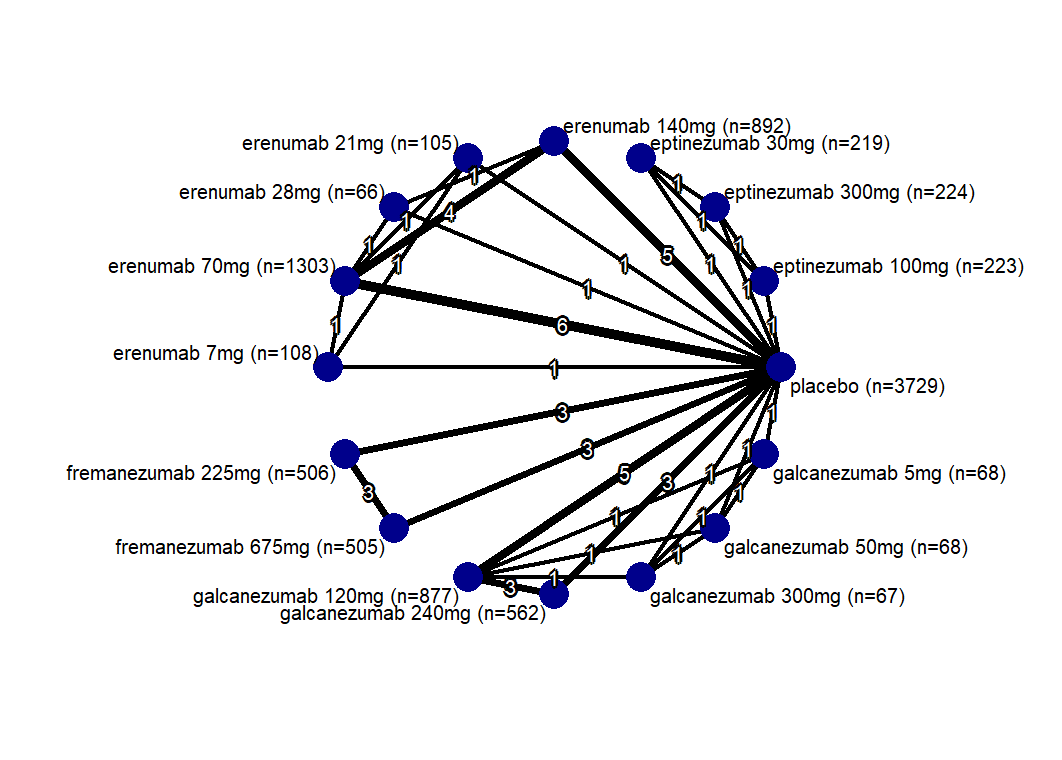


**Figure 17: Network plot for Adverse Events**

| eptinezumab 100mg | -0.13 [-0.43; 0.17] | -0.03 [-0.33; 0.27] | . | . | . | . | . | . | . | . | . | . | . | . | 0.23 [-0.07; 0.53] |
| --- | --- | --- | --- | --- | --- | --- | --- | --- | --- | --- | --- | --- | --- | --- | --- |
| -0.13 [-0.43; 0.17] | eptinezumab 300mg | 0.10 [-0.20; 0.40] | . | . | . | . | . | . | . | . | . | . | . | . | 0.36 [ 0.06; 0.66] |
| -0.03 [-0.33; 0.27] | 0.10 [-0.20; 0.40] | eptinezumab 30mg | . | . | . | . | . | . | . | . | . | . | . | . | 0.26 [-0.03; 0.56] |
| -0.22 [-0.55; 0.12] | -0.08 [-0.42; 0.25] | -0.18 [-0.52; 0.15] | erenumab 140mg | . | 0.21 [-0.17; 0.58] | 0.06 [-0.11; 0.24] | . | . | . | . | . | . | . | . | 0.46 [ 0.31; 0.62] |
| 0.16 [-0.27; 0.59] | 0.29 [-0.14; 0.72] | 0.19 [-0.24; 0.62] | 0.37 [ 0.04; 0.71] | erenumab 21mg | . | -0.20 [-0.56; 0.16] | 0.17 [-0.19; 0.53] | . | . | . | . | . | . | . | -0.01 [-0.35; 0.33] |
| 0.02 [-0.43; 0.46] | 0.15 [-0.30; 0.60] | 0.05 [-0.39; 0.50] | 0.23 [-0.10; 0.57] | -0.14 [-0.59; 0.31] | erenumab 28mg | -0.34 [-0.72; 0.03] | . | . | . | . | . | . | . | . | 0.37 [-0.01; 0.74] |
| -0.14 [-0.47; 0.18] | -0.01 [-0.34; 0.32] | -0.11 [-0.44; 0.22] | 0.07 [-0.09; 0.23] | -0.30 [-0.62; 0.01] | -0.16 [-0.49; 0.17] | erenumab 70mg | 0.37 [ 0.01; 0.73] | . | . | . | . | . | . | . | 0.38 [ 0.25; 0.52] |
| 0.33 [-0.10; 0.76] | 0.46 [ 0.03; 0.89] | 0.36 [-0.07; 0.79] | 0.54 [ 0.21; 0.88] | 0.17 [-0.19; 0.53] | 0.31 [-0.14; 0.75] | 0.47 [ 0.16; 0.78] | erenumab 7mg | . | . | . | . | . | . | . | -0.18 [-0.52; 0.16] |
| -0.27 [-0.62; 0.09] | -0.14 [-0.49; 0.22] | -0.23 [-0.59; 0.12] | -0.05 [-0.29; 0.19] | -0.43 [-0.79; -0.06] | -0.29 [-0.67; 0.10] | -0.12 [-0.35; 0.11] | -0.60 [-0.96; -0.23] | fremanezumab 225mg | 0.04 [-0.15; 0.23] | . | . | . | . | . | 0.50 [ 0.31; 0.69] |
| -0.23 [-0.58; 0.13] | -0.10 [-0.45; 0.26] | -0.19 [-0.55; 0.16] | -0.01 [-0.25; 0.23] | -0.39 [-0.75; -0.02] | -0.25 [-0.63; 0.14] | -0.08 [-0.31; 0.15] | -0.55 [-0.92; -0.19] | 0.04 [-0.15; 0.23] | fremanezumab 675mg | . | . | . | . | . | 0.46 [ 0.27; 0.65] |
| -0.27 [-0.60; 0.06] | -0.14 [-0.47; 0.19] | -0.24 [-0.57; 0.09] | -0.05 [-0.26; 0.15] | -0.43 [-0.77; -0.09] | -0.29 [-0.65; 0.07] | -0.13 [-0.32; 0.06] | -0.60 [-0.94; -0.26] | -0.00 [-0.24; 0.23] | -0.04 [-0.28; 0.19] | galcanezumab 120mg | 0.03 [-0.15; 0.21] | 0.19 [-0.22; 0.60] | 0.24 [-0.16; 0.65] | 0.21 [-0.20; 0.61] | 0.50 [ 0.36; 0.64] |
| -0.27 [-0.61; 0.07] | -0.14 [-0.48; 0.20] | -0.24 [-0.58; 0.10] | -0.05 [-0.28; 0.17] | -0.43 [-0.78; -0.07] | -0.29 [-0.66; 0.08] | -0.13 [-0.34; 0.09] | -0.60 [-0.95; -0.25] | -0.00 [-0.25; 0.25] | -0.04 [-0.29; 0.21] | -0.00 [-0.17; 0.17] | galcanezumab 240mg | . | . | . | 0.53 [ 0.35; 0.70] |
| 0.07 [-0.39; 0.53] | 0.20 [-0.25; 0.66] | 0.10 [-0.35; 0.56] | 0.29 [-0.09; 0.66] | -0.09 [-0.56; 0.38] | 0.05 [-0.43; 0.53] | 0.21 [-0.16; 0.59] | -0.26 [-0.72; 0.21] | 0.34 [-0.06; 0.73] | 0.30 [-0.10; 0.69] | 0.34 [-0.01; 0.69] | 0.34 [-0.03; 0.72] | galcanezumab 300mg | 0.05 [-0.36; 0.46] | 0.01 [-0.40; 0.42] | 0.06 [-0.31; 0.43] |
| 0.12 [-0.33; 0.58] | 0.25 [-0.20; 0.71] | 0.16 [-0.30; 0.61] | 0.34 [-0.04; 0.71] | -0.04 [-0.50; 0.43] | 0.10 [-0.37; 0.58] | 0.27 [-0.10; 0.64] | -0.20 [-0.67; 0.26] | 0.39 [ 0.00; 0.78] | 0.35 [-0.04; 0.74] | 0.39 [ 0.04; 0.74] | 0.39 [ 0.02; 0.77] | 0.05 [-0.36; 0.46] | galcanezumab 50mg | -0.04 [-0.45; 0.37] | 0.01 [-0.36; 0.38] |
| 0.08 [-0.37; 0.54] | 0.22 [-0.24; 0.67] | 0.12 [-0.34; 0.57] | 0.30 [-0.08; 0.68] | -0.07 [-0.54; 0.39] | 0.07 [-0.41; 0.55] | 0.23 [-0.14; 0.60] | -0.24 [-0.71; 0.22] | 0.35 [-0.04; 0.75] | 0.31 [-0.08; 0.71] | 0.35 [ 0.00; 0.71] | 0.35 [-0.02; 0.73] | 0.01 [-0.40; 0.42] | -0.04 [-0.45; 0.37] | galcanezumab 5mg | 0.05 [-0.33; 0.42] |
| 0.23 [-0.07; 0.53] | 0.36 [ 0.06; 0.66] | 0.26 [-0.03; 0.56] | 0.45 [ 0.30; 0.60] | 0.07 [-0.24; 0.39] | 0.21 [-0.12; 0.54] | 0.37 [ 0.24; 0.51] | -0.10 [-0.41; 0.21] | 0.50 [ 0.31; 0.69] | 0.46 [ 0.27; 0.65] | 0.50 [ 0.36; 0.64] | 0.50 [ 0.34; 0.67] | 0.16 [-0.19; 0.51] | 0.11 [-0.24; 0.45] | 0.15 [-0.20; 0.49] | placebo |

**Table 9: League Table for AEs**


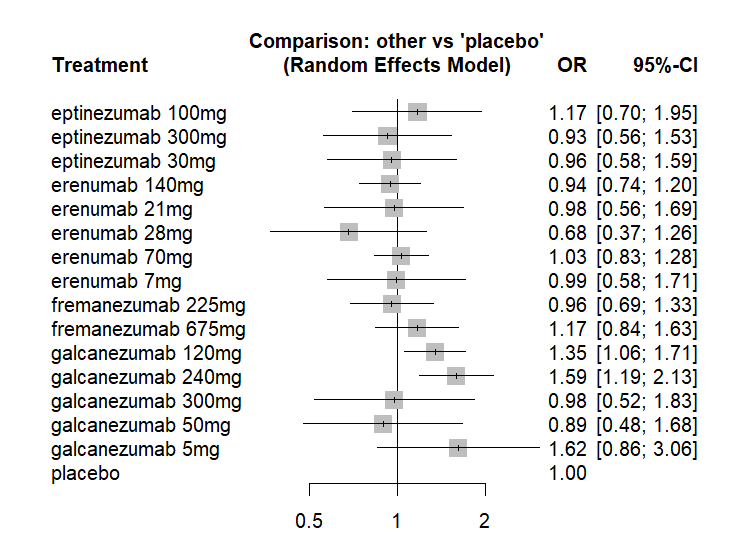


**Figure 18: Forest plot for Adverse Events**


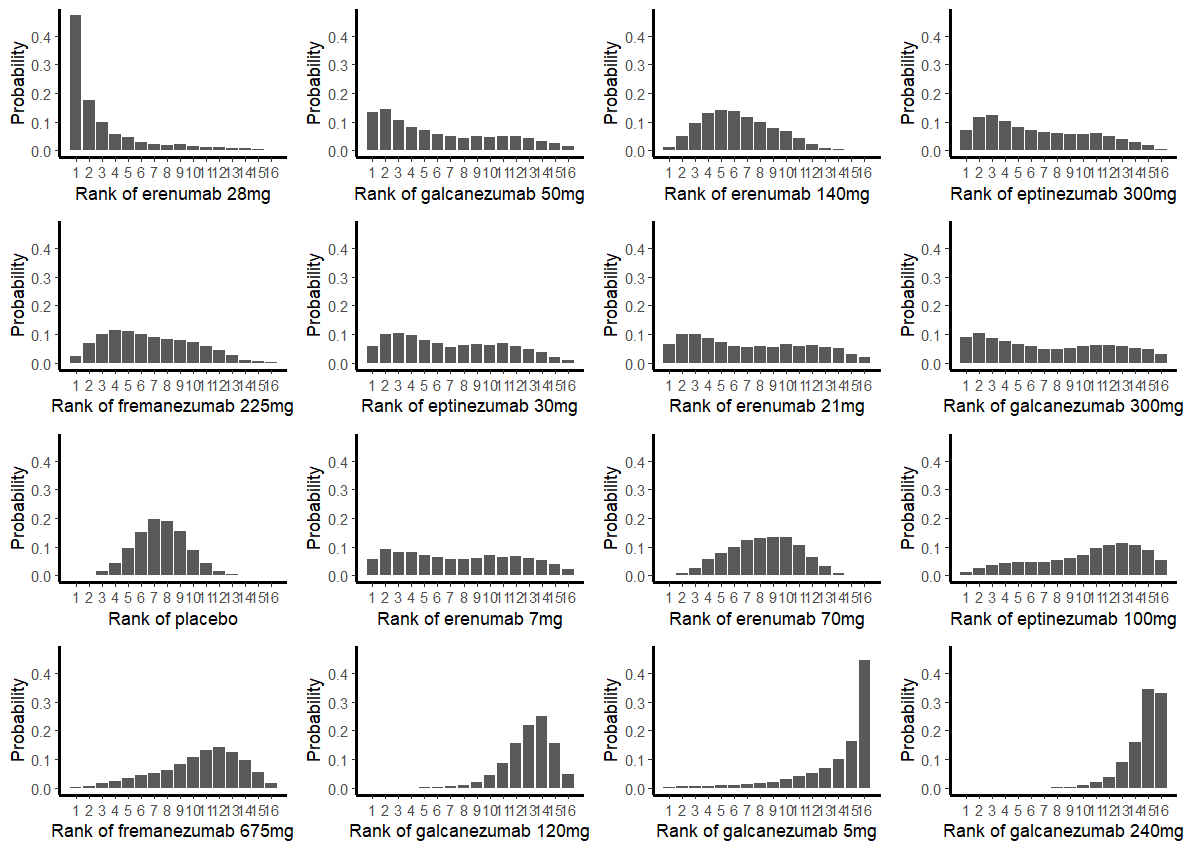


**Figure 19: Rank plot for Adverse Events**


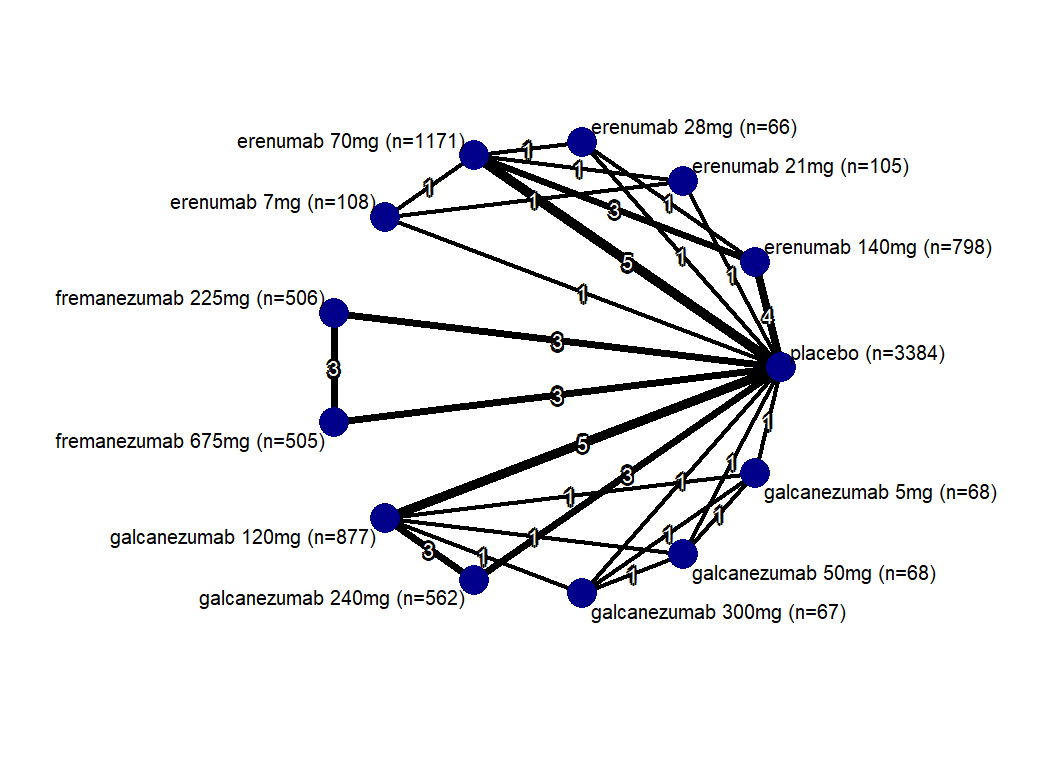


**Figure 20: Network plot for Serious Adverse Events**

| erenumab 140mg | . | 0.48 [0.03; 7.76] | 0.67 [0.26; 1.72] | . | . | . | . | . | . | . | . | 0.72 [0.30; 1.73] |
| --- | --- | --- | --- | --- | --- | --- | --- | --- | --- | --- | --- | --- |
| 1.77 [0.08; 39.60] | erenumab 21mg | . | 0.33 [0.01; 8.28] | 0.34 [0.01; 8.43] | . | . | . | . | . | . | . | 0.48 [0.02; 11.94] |
| 0.91 [0.10; 8.50] | 0.51 [0.01; 20.50] | erenumab 28mg | 2.06 [0.13; 33.48] | . | . | . | . | . | . | . | . | 0.51 [0.06; 4.63] |
| 0.73 [0.31; 1.76] | 0.41 [0.02; 8.48] | 0.81 [0.09; 7.27] | erenumab 70mg | 1.02 [0.10; 9.95] | . | . | . | . | . | . | . | 0.92 [0.47; 1.80] |
| 0.60 [0.07; 5.05] | 0.34 [0.01; 8.43] | 0.66 [0.04; 12.24] | 0.82 [0.11; 6.08] | erenumab 7mg | . | . | . | . | . | . | . | 1.42 [0.15; 13.82] |
| 1.13 [0.27; 4.64] | 0.63 [0.03; 16.00] | 1.24 [0.11; 14.05] | 1.54 [0.41; 5.74] | 1.87 [0.19; 18.66] | fremanezumab 225mg | 1.00 [0.32; 3.14] | . | . | . | . | . | 0.68 [0.21; 2.22] |
| 1.13 [0.27; 4.66] | 0.64 [0.03; 16.07] | 1.24 [0.11; 14.11] | 1.54 [0.41; 5.76] | 1.87 [0.19; 18.73] | 1.00 [0.32; 3.14] | fremanezumab 675mg | . | . | . | . | . | 0.68 [0.21; 2.22] |
| 0.38 [0.12; 1.18] | 0.21 [0.01; 4.80] | 0.42 [0.04; 4.05] | 0.52 [0.19; 1.42] | 0.63 [0.07; 5.34] | 0.34 [0.09; 1.32] | 0.33 [0.08; 1.32] | galcanezumab 120mg | 1.20 [0.51; 2.83] | 0.31 [0.01; 7.85] | 0.97 [0.02; 49.66] | 0.32 [0.01; 7.97] | 1.76 [0.81; 3.82] |
| 0.39 [0.11; 1.29] | 0.22 [0.01; 5.04] | 0.42 [0.04; 4.30] | 0.53 [0.18; 1.57] | 0.64 [0.07; 5.67] | 0.34 [0.08; 1.44] | 0.34 [0.08; 1.43] | 1.02 [0.44; 2.34] | galcanezumab 240mg | . | . | . | 2.25 [0.90; 5.63] |
| 0.11 [0.01; 1.73] | 0.06 [0.00; 3.43] | 0.13 [0.00; 3.61] | 0.16 [0.01; 2.24] | 0.19 [0.01; 4.97] | 0.10 [0.01; 1.70] | 0.10 [0.01; 1.70] | 0.30 [0.02; 3.99] | 0.30 [0.02; 4.25] | galcanezumab 300mg | 3.09 [0.12; 77.21] | 1.02 [0.10; 10.01] | 6.20 [0.25; 154.32] |
| 0.36 [0.01; 12.11] | 0.20 [0.00; 19.30] | 0.39 [0.01; 22.30] | 0.48 [0.01; 15.90] | 0.59 [0.01; 31.19] | 0.32 [0.01; 11.68] | 0.31 [0.01; 11.64] | 0.94 [0.03; 28.97] | 0.92 [0.03; 30.19] | 3.09 [0.12; 77.21] | galcanezumab 50mg | 0.33 [0.01; 8.21] | 2.01 [0.04; 102.25] |
| 0.12 [0.01; 1.75] | 0.07 [0.00; 3.48] | 0.13 [0.00; 3.66] | 0.16 [0.01; 2.27] | 0.19 [0.01; 5.04] | 0.10 [0.01; 1.73] | 0.10 [0.01; 1.72] | 0.31 [0.02; 4.05] | 0.30 [0.02; 4.31] | 1.02 [0.10; 10.01] | 0.33 [0.01; 8.21] | galcanezumab 5mg | 6.11 [0.25; 152.01] |
| 0.69 [0.30; 1.60] | 0.39 [0.02; 7.98] | 0.76 [0.09; 6.49] | 0.94 [0.48; 1.83] | 1.15 [0.15; 8.47] | 0.61 [0.20; 1.91] | 0.61 [0.20; 1.91] | 1.83 [0.85; 3.93] | 1.79 [0.75; 4.27] | 6.01 [0.46; 78.80] | 1.94 [0.06; 59.85] | 5.92 [0.45; 77.62] | placebo |

**Table 10: League Table for SAEs**


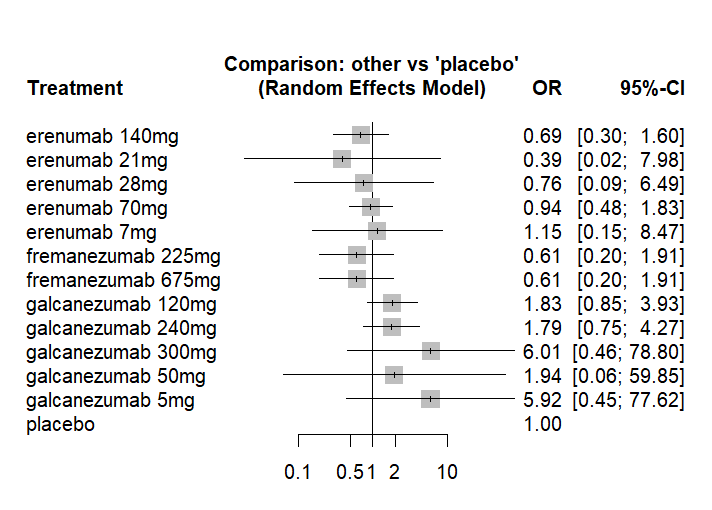


**Figure 21: Forest plot for Serious Adverse Events**


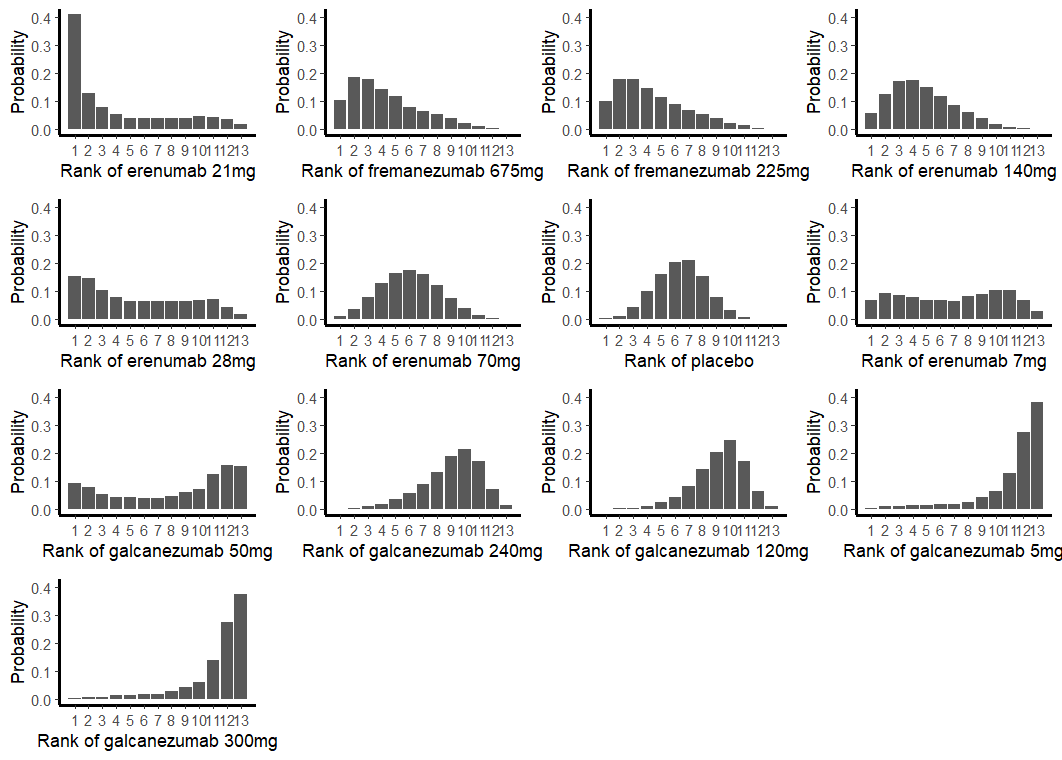


**Figure 22: Rank plot for SAEs**


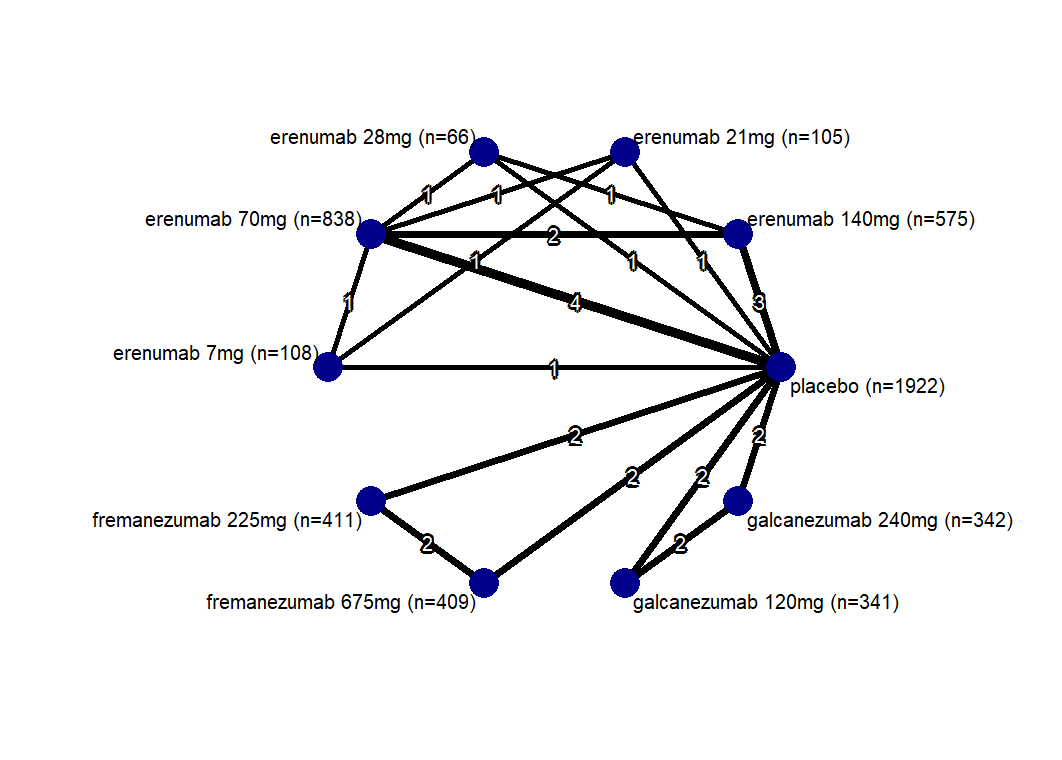


**Figure 23: Network plot for DC AE**

| erenumab 140mg | . | 0.48 [0.01; 25.38] | 0.62 [0.21; 1.86] | . | . | . | . | . | 0.70 [0.24; 2.03] |
| --- | --- | --- | --- | --- | --- | --- | --- | --- | --- |
| 0.67 [0.10; 4.74] | erenumab 21mg | . | 0.67 [0.10; 4.34] | 1.03 [0.13; 7.89] | . | . | . | . | 1.47 [0.19; 11.20] |
| 1.11 [0.05; 24.19] | 1.66 [0.05; 50.68] | erenumab 28mg | 0.40 [0.02; 8.81] | . | . | . | . | . | 0.68 [0.03; 17.52] |
| 0.50 [0.18; 1.41] | 0.75 [0.13; 4.26] | 0.45 [0.02; 8.89] | erenumab 70mg | 1.54 [0.24; 10.04] | . | . | . | . | 1.71 [0.75; 3.87] |
| 0.69 [0.10; 4.88] | 1.03 [0.13; 7.89] | 0.62 [0.02; 19.02] | 1.38 [0.24; 7.86] | erenumab 7mg | . | . | . | . | 1.42 [0.19; 10.88] |
| 0.84 [0.18; 3.94] | 1.25 [0.15; 10.39] | 0.75 [0.03; 18.85] | 1.67 [0.41; 6.88] | 1.21 [0.15; 10.10] | fremanezumab 225mg | 1.17 [0.34; 4.05] | . | . | 1.00 [0.31; 3.19] |
| 0.96 [0.19; 4.77] | 1.43 [0.17; 12.40] | 0.86 [0.03; 22.21] | 1.92 [0.44; 8.37] | 1.39 [0.16; 12.05] | 1.15 [0.34; 3.93] | fremanezumab 675mg | . | . | 0.86 [0.25; 2.95] |
| 0.61 [0.14; 2.70] | 0.90 [0.11; 7.24] | 0.55 [0.02; 13.31] | 1.21 [0.31; 4.69] | 0.88 [0.11; 7.03] | 0.73 [0.15; 3.55] | 0.63 [0.12; 3.25] | galcanezumab 120mg | 0.92 [0.35; 2.41] | 1.20 [0.39; 3.73] |
| 0.61 [0.14; 2.55] | 0.90 [0.12; 6.93] | 0.54 [0.02; 12.92] | 1.21 [0.33; 4.39] | 0.87 [0.11; 6.73] | 0.72 [0.16; 3.36] | 0.63 [0.13; 3.08] | 1.00 [0.38; 2.60] | galcanezumab 240mg | 1.63 [0.59; 4.53] |
| 0.84 [0.30; 2.33] | 1.25 [0.21; 7.35] | 0.75 [0.04; 15.17] | 1.67 [0.74; 3.75] | 1.21 [0.21; 7.14] | 1.00 [0.31; 3.19] | 0.87 [0.25; 2.98] | 1.38 [0.47; 4.08] | 1.38 [0.51; 3.79] | placebo |

**Table 11: League Table for DC**


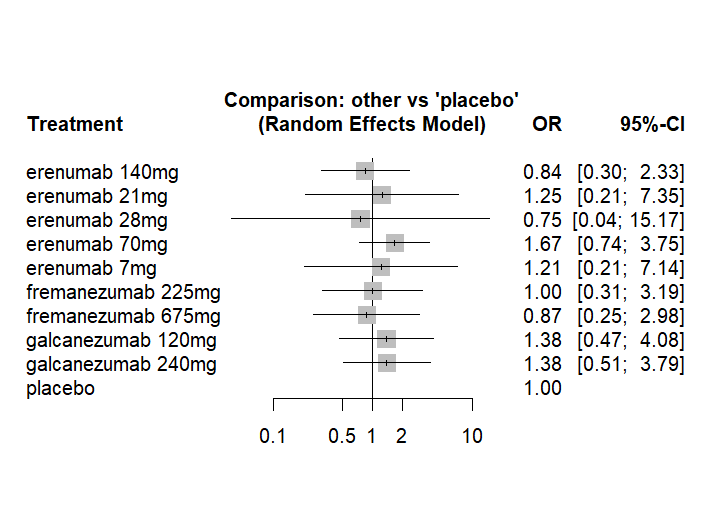


**Figure 24: Forest plot for DC AE**


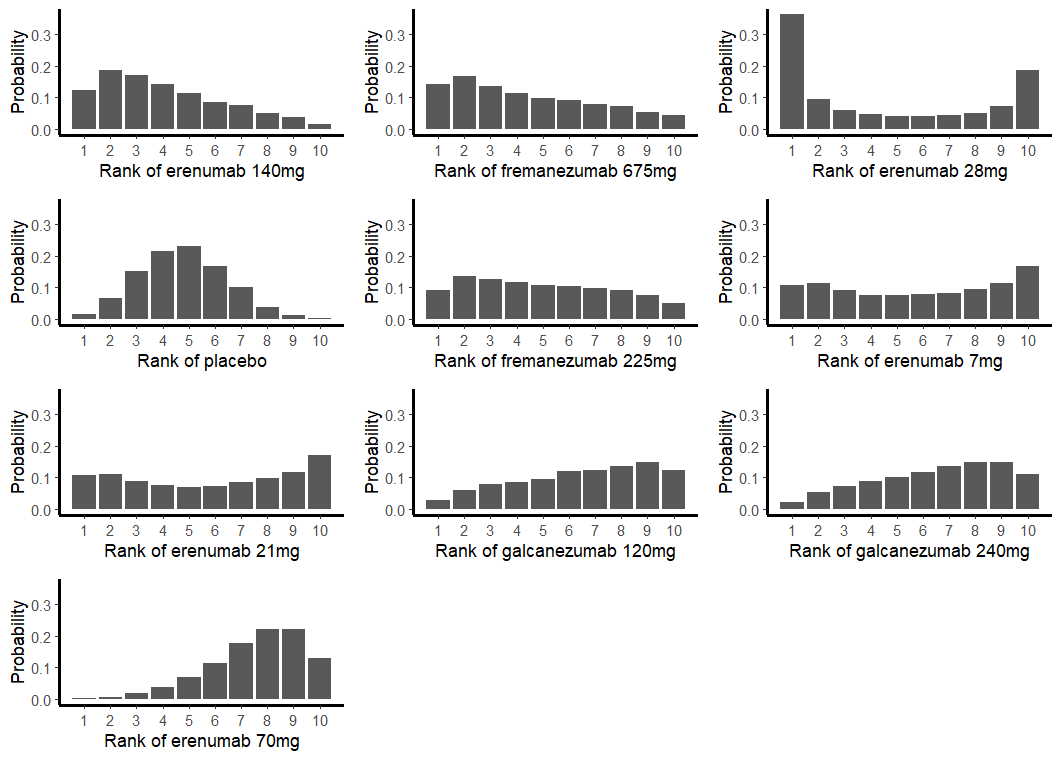


**Figure 25: Rank plot for DC AE**


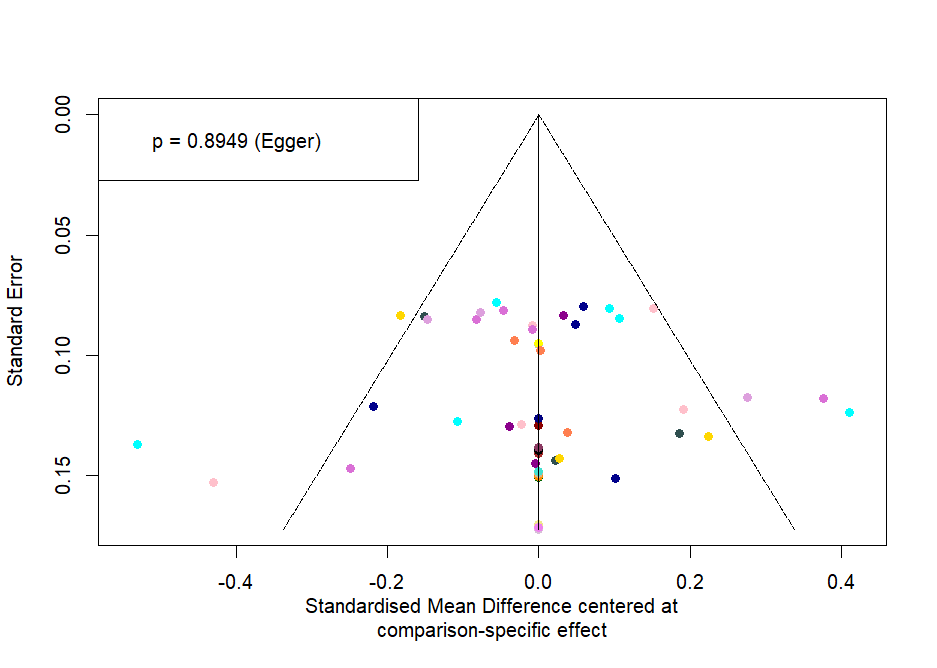


**Figure 26: Funnel plot**


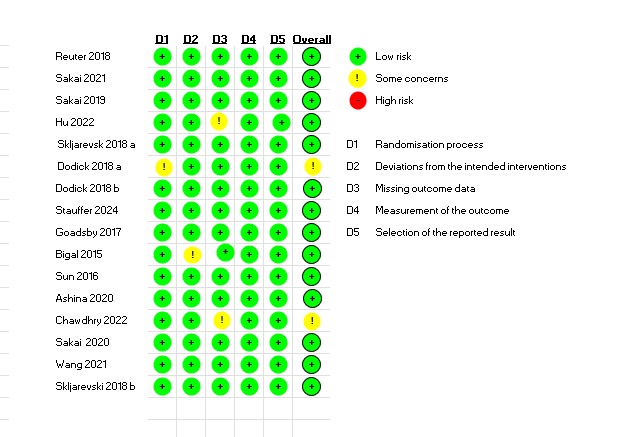


**Figure 27: Traffic plot for risk of bias**
